# Supplementary material for: Characteristics of autosomal dominant WFS1-associated optic neuropathy and its comparability to OPA1-associated autosomal dominant optic atrophy
Source: PubMed Central journal article supplement — Sci Rep. 2024 Oct 3;14:22956. doi: 10.1038/s41598-024-74364-x (PMC11450207; doi:10.1038/s41598-024-74364-x), 2024-10-03
Supplement: 41598_2024_74364_MOESM1_ESM.pdf [file 41598_2024_74364_MOESM1_ESM.pdf]

## Characteristics of autosomal dominant *WFS1*-associated optic neuropathy and its comparability to *OPA1*-associated autosomal dominant optic atrophy

Cansu de Muijnck; Lonneke Haer-Wigman; Judith A.M. van Everdingen; Tanya Lushchyk; Pam A.T. Heutinck; Marieke F. van Dooren; Anneke J. Kievit; Virginie J.M. Verhoeven; Marleen E.H. Simon; Rosemarie A. Wasmann; Irene C. Notting, Elfride De Baere; Sophie Walraedt; Julie De Zaeytijd; Filip Van den Broeck; Bart P. Leroy; Camiel J.F. Boon; Maria M. van Genderen\*.

**Supp Figure 1.** Development of visual acuity over the years. Patients who were diagnosed with optic atrophy under the age of 18 showed fluctuations in the visual acuity, most probably due to the counteracting effects of the maturing visual system versus progressive optic atrophy. Adult onset optic atrophy patients showed on the other hand, relatively a stable visual acuity over the years. One adult patient with visual acuity of 2.0 LogMAR (dark blue line) had, in addition to optic atrophy, corneal band keratopathy in the left eye and vitreomacular traction in both eyes but was not treated operatively because potential visual gain was expected to be insignificant.

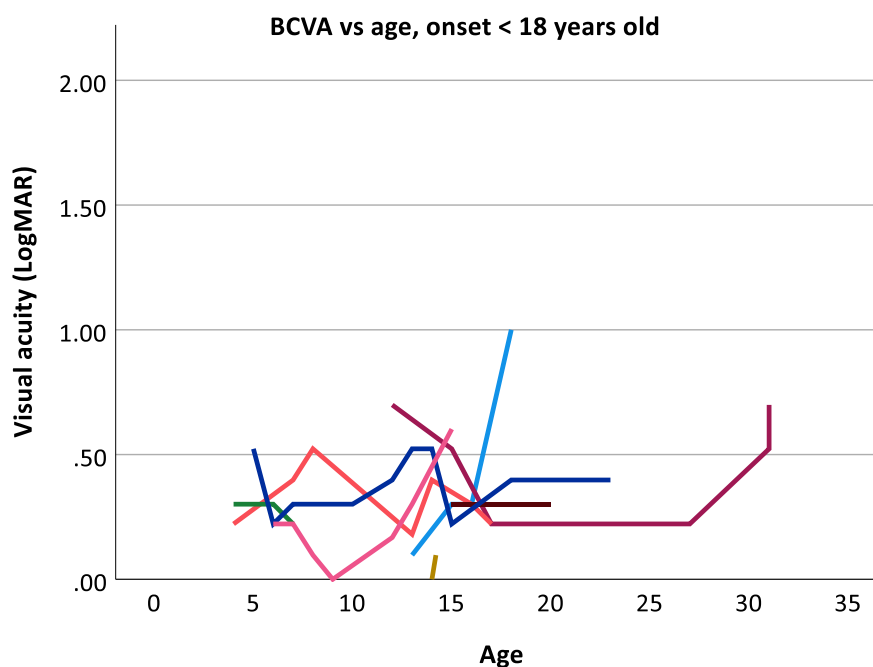

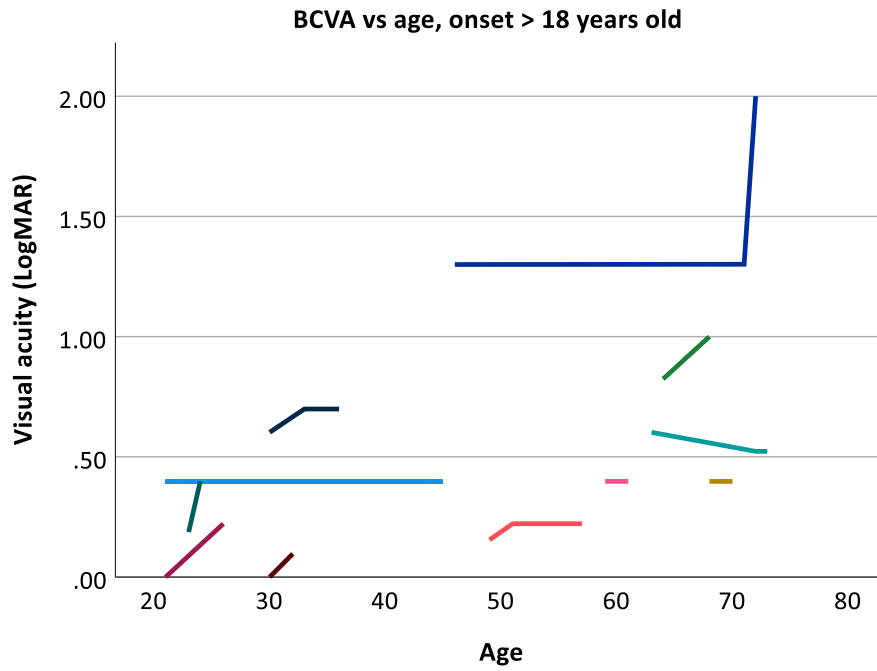

**Supp Figure 2.** Ultrasound (A) and the optical coherence tomography (B) images of the anterior segment showing cystoid iridocorneal membrane obliterating the anterior chamber space

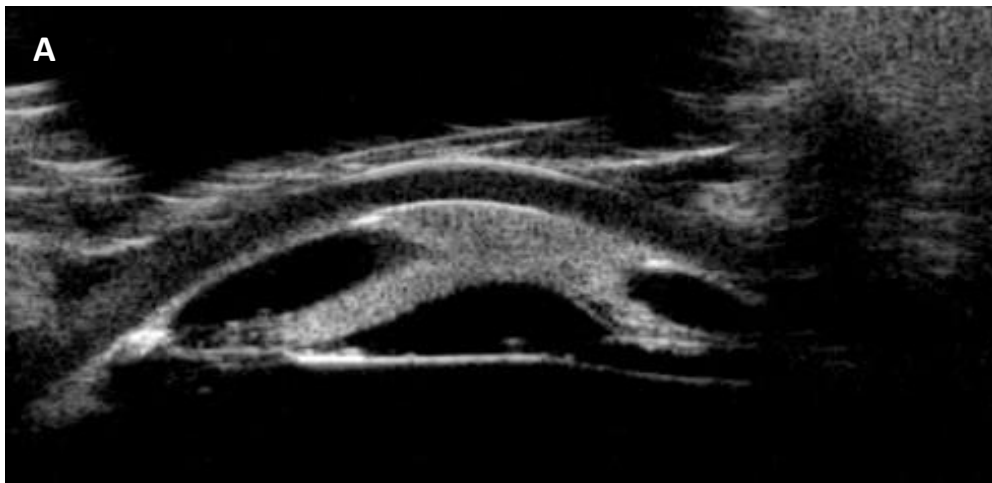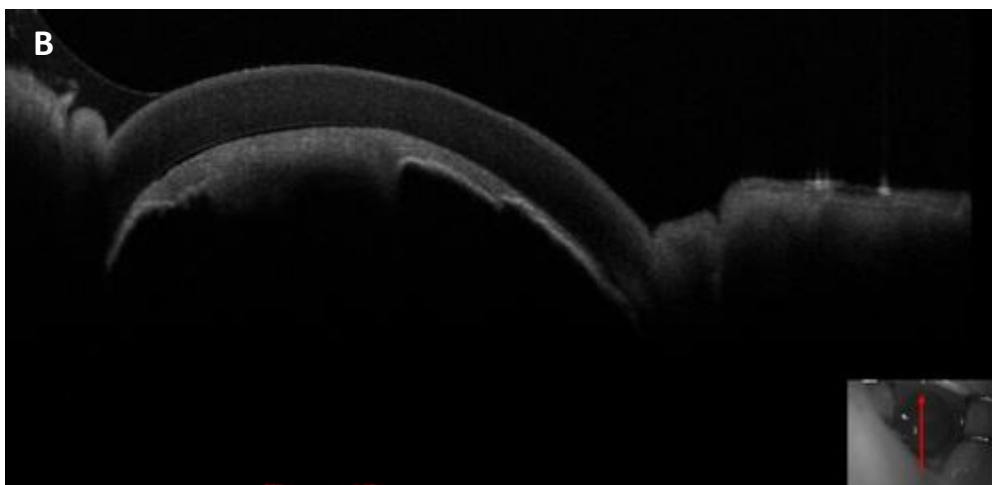

**Supplementary Table 1.** Summary of the pathogenicity assessment of the disease associated *WFS1* variants in this cohort. ¶ harboured by the same individual.

| Variant                                                           | ACMG classification                                    | Classification                               |
|-------------------------------------------------------------------|--------------------------------------------------------|----------------------------------------------|
| c.683G>A¶<br>p.(Arg228His)                                        | BS1, BP2                                               | Likely benign<br>(class 2)                   |
| c.937C>T<br>p.(His313Tyr);                                        | PS2_Very Strong, PS3, PM2_Supporting, PP3, PP4         | Pathogenic (class 5)                         |
| c.[991_993del;1597C>T]<br>p.[(Phe331del);(Pro533Ser)],<br>de novo | PS2, PM2_Supporting, PM4, PP4                          | Likely Pathogenic<br>(class 4)               |
| c.1672C>T<br>p.(Arg558Cys)                                        | PM3_Very Strong, PM5, PP3, PP4                         | Pathogenic (class 5)                         |
| c.2002C>T<br>p.(Gln668*)                                          | PVS1, PM3_Strong, PM2_Supporting, PP1, PP4             | Pathogenic (class 5)                         |
| c.2044A>G<br>p.(Asn682Asp)                                        | PM2_Supporting, PP1, PP3, PP4                          | Variant of unknown<br>significance (class 3) |
| c.2051C>T<br>p.(Ala684Val)                                        | PS2_Very Strong, PS3, PM2_Supporting, PM5,<br>PP3, PP4 | Pathogenic (class 5)                         |
| c.2213C>A<br>p.(Ala738Asp)                                        | PM2_Supporting, PM3, PP1_Strong, PP4                   | Likely pathogenic<br>(class 4)               |
| c.2389G>A<br>p.(Asp797Asn)                                        | PS2, PM2_Supporting, PM5, PP3, PP4                     | Likely pathogenic<br>(class 4)               |
| c.2389G>T<br>p.(Asp797Tyr)                                        | PM2_Supporting, PM5_Strong, PP3, PP4                   | Likely pathogenic<br>(class 4)               |
| c.2425G>A<br>p.(Glu809Lys)                                        | PS2_Very Strong, PM2_Supporting, PP3, PP4              | Pathogenic (class 5)                         |
| c.2430C>A¶<br>p.(Phe810Leu), de novo                              | PS2, PM2_Supporting, PP3, PP4                          | Likely pathogenic<br>(class 4)               |
| c.2541C>G<br>p.(Cys847Trp)                                        | PM2_Supporting, PP3                                    | Variant of unknown<br>significance (class 3) |
| c.2590G>A<br>p.(Glu864Lys)                                        | PS2, PM2_Supporting, PP1_Strong, PP3, PP4              | Pathogenic (class 5)                         |

**Supplementary table 2.** Details of the retinal nerve fiber layer measurements of the optic nerve head OCT. Normal = healthy controls; DOA = dominant optic atrophy patients; *WFS1* = autosomal dominant *WFS1* associated optic neuropathy patients.

| RNFL (μm) | Type           | N  | Mean   | Std. Deviation | Std. Error | 95% Confidence Interval for Mean |             | Minimum | Maximum |
|-----------|----------------|----|--------|----------------|------------|----------------------------------|-------------|---------|---------|
|           |                |    |        |                |            | Lower Bound                      | Upper Bound |         |         |
| Temporal  | Normal         | 32 | 73.59  | 15.339         | 2.712      | 68.06                            | 79.12       | 53      | 122     |
|           | DOA            | 36 | 39.08  | 12.348         | 2.058      | 34.91                            | 43.26       | 17      | 77      |
|           | AD <i>WFS1</i> | 30 | 37.00  | 14.205         | 2.594      | 31.70                            | 42.30       | 17      | 64      |
| Superior  | Normal         | 32 | 135.16 | 22.760         | 4.023      | 126.95                           | 143.36      | 95      | 192     |
|           | DOA            | 36 | 99.22  | 19.982         | 3.330      | 92.46                            | 105.98      | 66      | 130     |
|           | AD <i>WFS1</i> | 29 | 65.41  | 15.665         | 2.909      | 59.46                            | 71.37       | 23      | 96      |
| Nasal     | Normal         | 32 | 75.19  | 15.890         | 2.809      | 69.46                            | 80.92       | 51      | 110     |
|           | DOA            | 36 | 61.28  | 15.178         | 2.530      | 56.14                            | 66.41       | 39      | 91      |
|           | AD <i>WFS1</i> | 30 | 44.77  | 15.395         | 2.811      | 39.02                            | 50.52       | 6       | 72      |
| Inferior  | Normal         | 32 | 139.16 | 22.558         | 3.988      | 131.02                           | 147.29      | 109     | 211     |
|           | DOA            | 36 | 83.53  | 19.725         | 3.287      | 76.85                            | 90.20       | 57      | 150     |
|           | AD <i>WFS1</i> | 30 | 65.83  | 21.241         | 3.878      | 57.90                            | 73.76       | 30      | 131     |
